# Supplementary material for: Magnetism-tuning strategies for graphene oxide based on magnetic oligoacene oxide patches model
Source: Royal Society of Chemistry journal article supplement (doi:10.1039/c7cp06405e), 2018-01-01
Supplement: c7cp06405e1.pdf [file c7cp06405e1.pdf]

## Magnetism-Tuning Strategies of Graphene Oxide: Based on Theoretical Simulation of Magnetic Oligoacene Oxide Patches

Yanjie Wen,<sup>a</sup> Linyin Yan,<sup>\*b</sup> Hirohiko Kono,<sup>c</sup> ShengHsien Lin<sup>d</sup> and Yong-Chien Ling<sup>\*a</sup>

*a* Department of Chemistry, National Tsing Hua University, Hsinchu 30013, Taiwan. E-mail: ycling@mx.nthu.edu.tw

*b* Beijing National Laboratory for Molecular Sciences (BNLMS), Institute of Chemistry, Chinese Academy of Sciences, Beijing 100190, China. E-mail: yanlinylin@iccas.ac.cn; Tel: +86-13810491497.

*c* Department of Chemistry, Graduate School of Science, Tohoku University, Sendai 980-8578, Japan.

*d* Department of Applied Chemistry, National Chiao Tung University, Hsinchu 30013, Taiwan.

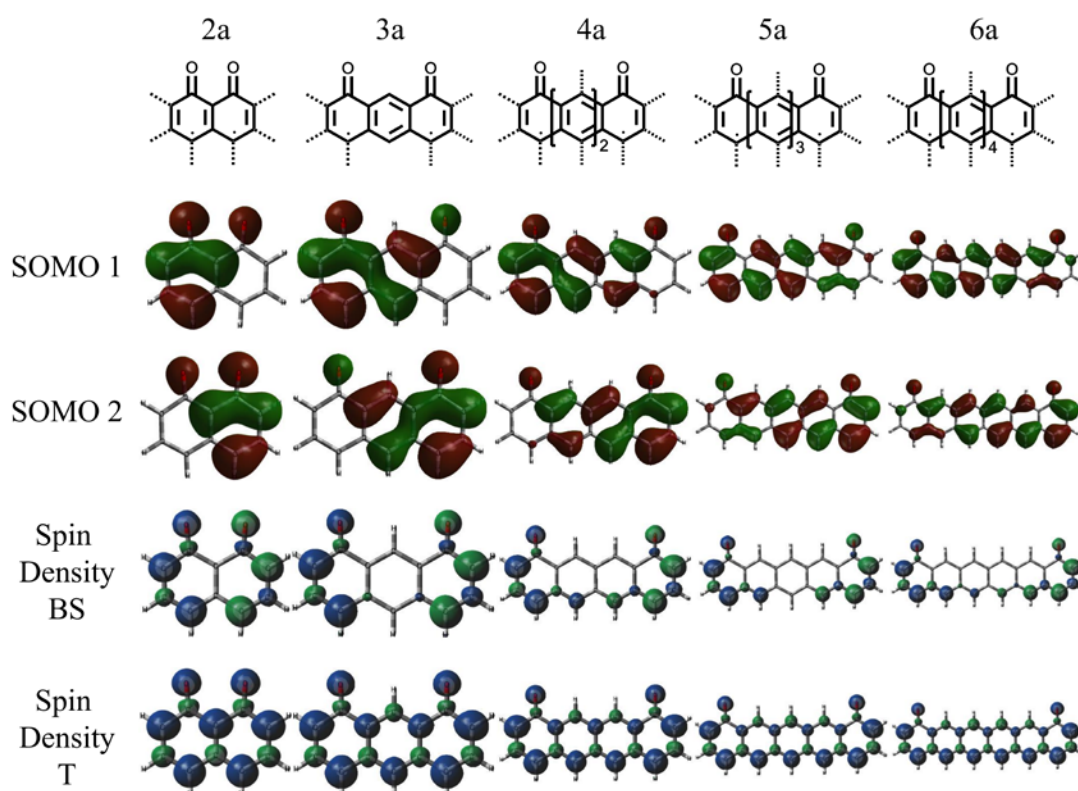

Figure S1 Topological representation of different series of a-series diradicals, SOMOs for each radical, distribution of the spin densities of BS (open-shell broken-symmetry) state and T (triplet) state.

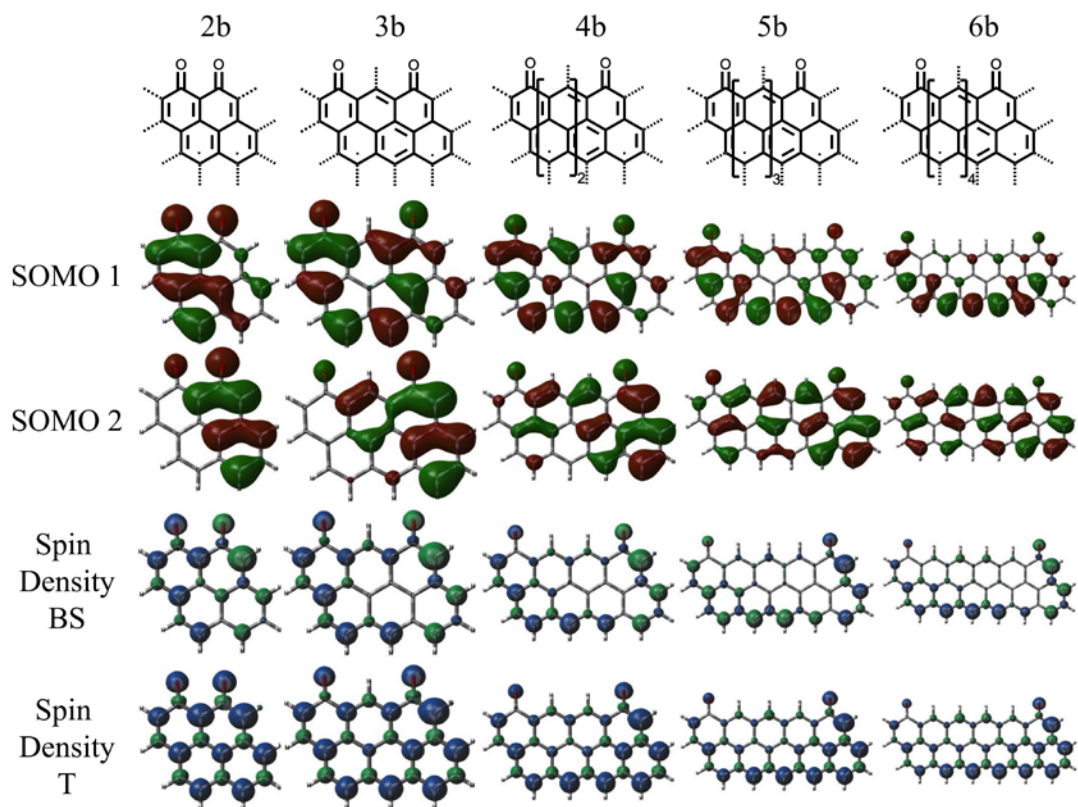

Figure S2 Topological representation of different series of b-series diradicals, SOMOs for each radical, distribution of the spin densities of BS (open-shell broken-symmetry) state and T (triplet) state.

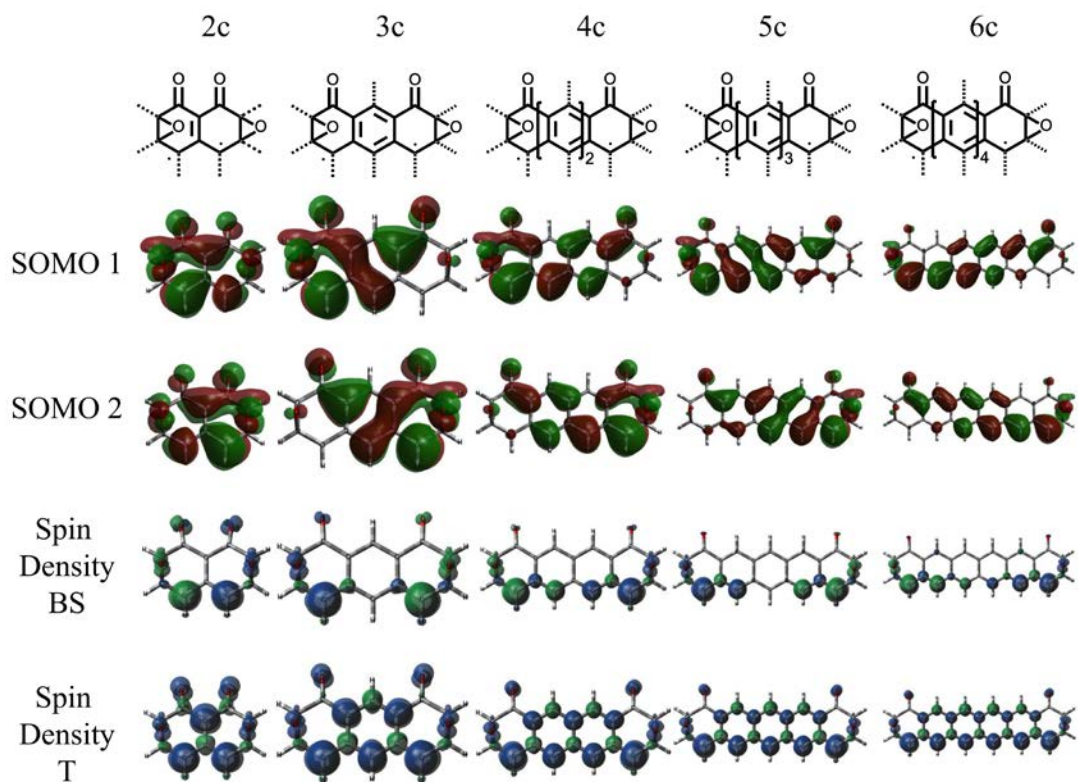

Figure S3 Topological representation of different series of c-series diradicals, SOMOs for each radical, distribution of the spin densities of BS (open-shell broken-symmetry) state and T (triplet) state.

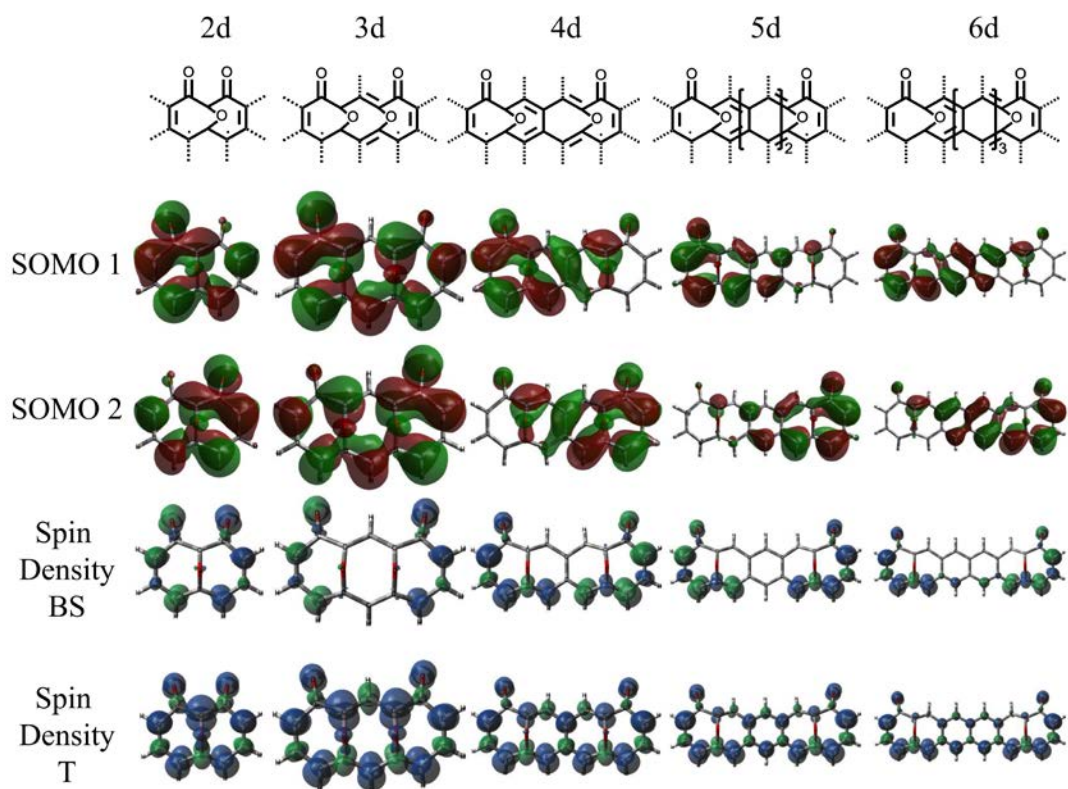

Figure S4 Topological representation of different series of d-series diradicals, SOMOs for each radical, distribution of the spin densities of BS (open-shell broken-symmetry) state and T (triplet) state.



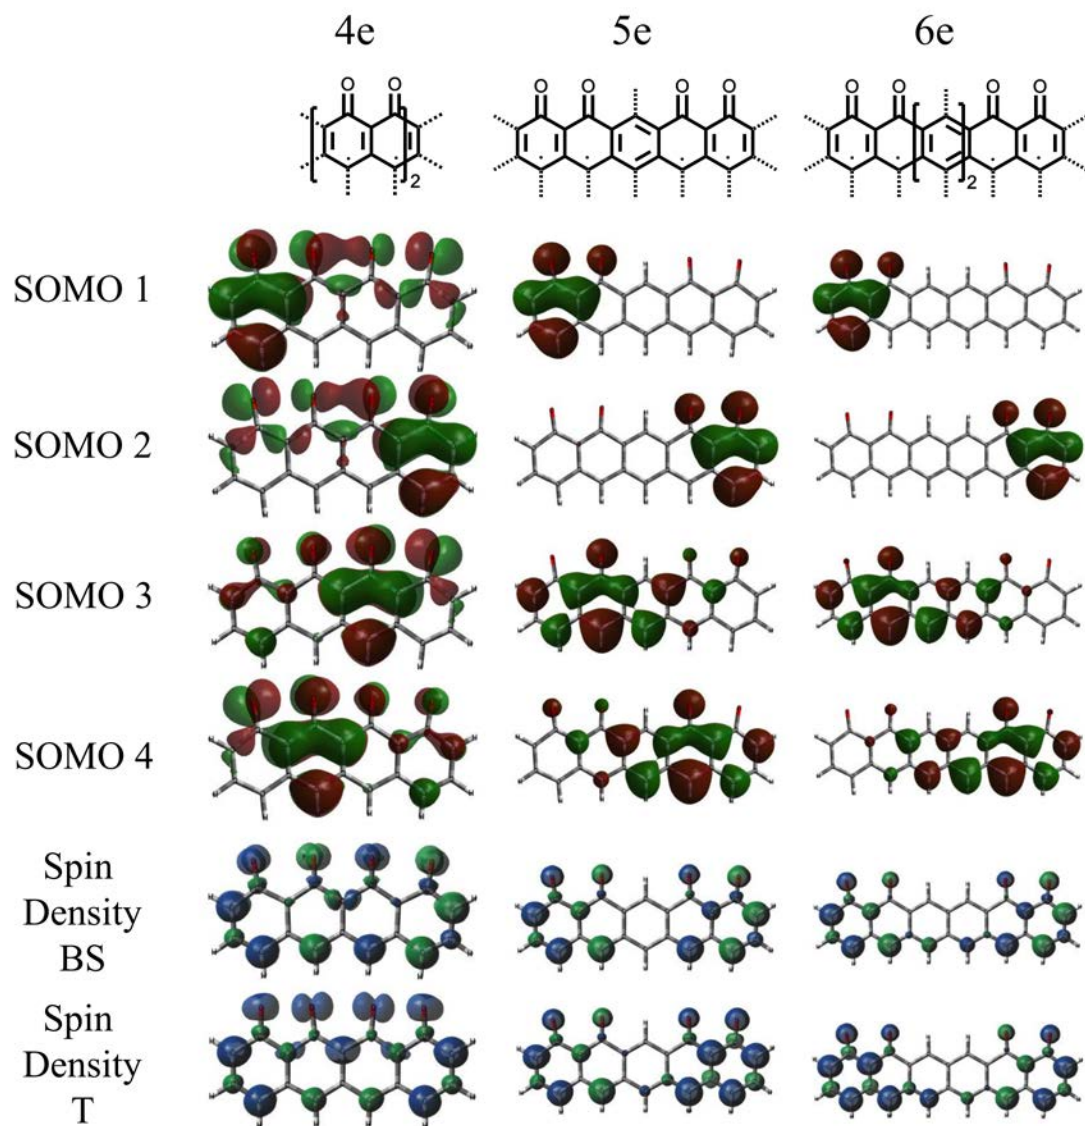

Figure S5 Topological representation of different series of e-series molecules, SOMOs for each radical, distribution of the spin densities of BS (open-shell broken-symmetry) state and T (triplet) state.

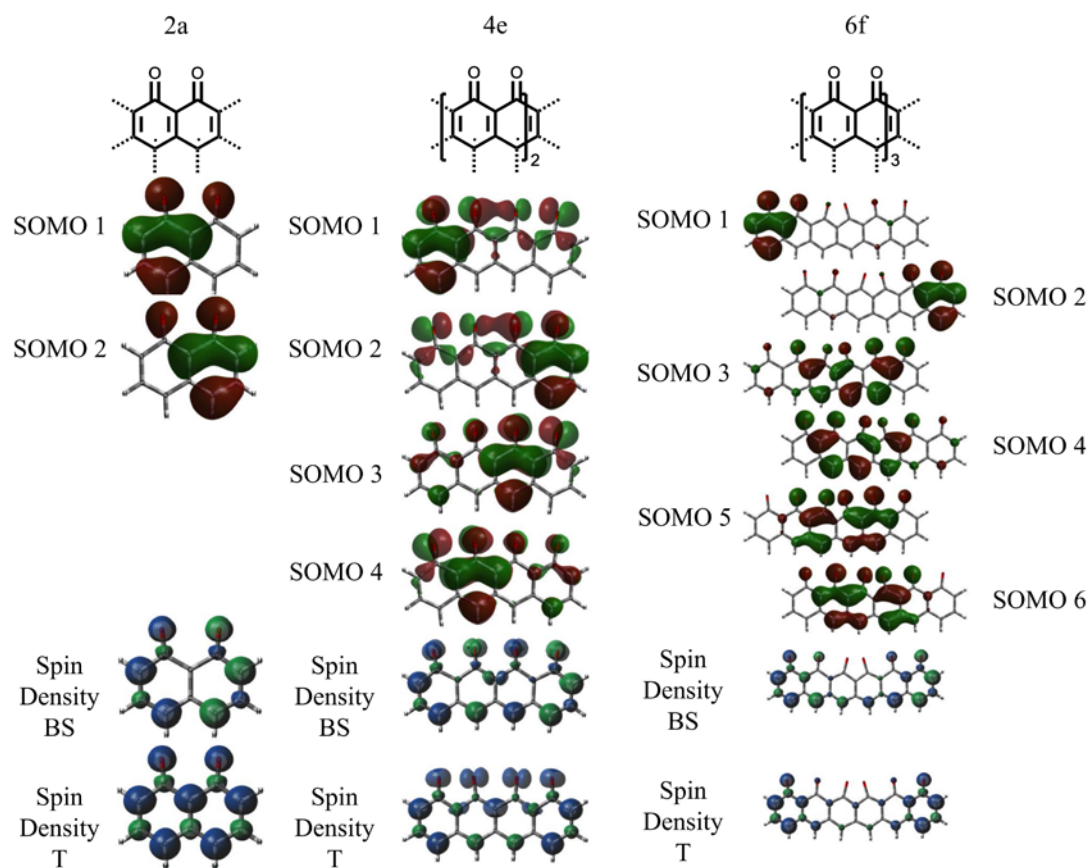

Figure S6 Topological representation of different series of 2a, 4e and 6f, SOMOs for each radical, distribution of the spin densities of BS (open-shell broken-symmetry) state and T (triplet) state.
